# Supplementary material for: In situ growth of crystalline carbon nitride on LaOCl for photocatalytic overall water splitting
Source: Royal Society of Chemistry journal article supplement (doi:10.1039/d2ta00068g), 2022-01-01
Supplement: d2ta00068g1.pdf [file d2ta00068g1.pdf]

## Electronic Supplementary Information (ESI)

# In-situ Growth of Crystalline Carbon Nitride on LaOCl for Photocatalytic Overall Water Splitting

*Yuan Lin, Xuxu Wang, Xianzhi Fu, Wenyue Su\**

*State Key Laboratory of Photocatalysis on Energy and Environment, College of Chemistry,  
Fuzhou University, Fuzhou, 350116, PR China*

\*Corresponding author. E-mail: suweny@fzu.edu.cn

### Contents list

#### Experimental Section

- Figure S1.** Schematic of two-step photon excitation (a) and one-step photon excitation (b) pathway.
- Figure S2.** SEM images of LaOCl (a) and CCN (b).
- Figure S3.** HRTEM image of PCN/LaOCl (a) and CCN/LaOCl (b).
- Figure S4.** Nitrogen adsorption–desorption isotherms of CCN, CCN/LaOCl-*x* and PCN/LaOCl.
- Figure S5.** SEM image of (a) CCN/LaOCl-1.5 and (b) CCN/LaOCl-2.
- Figure S6.** UV/Vis DRS spectrum of CCN, CCN/LaOCl-*x* and LaOCl.
- Figure S7.** High resolution XPS spectra of (a) C 1s and (b) N 1s of CCN/LaOCl and CCN. (c) High resolution XPS spectra of La 3d for LaOCl and CCN/LaOCl.
- Figure S8.** The transient photocurrents of the prepared electrodes covered with PCN/LaOCl and CCN/LaOCl.
- Figure S9.** The EIS Nyquist plots of the prepared electrodes covered with PCN/LaOCl and CCN/LaOCl.
- Figure S10.** Photoluminescence spectra of PCN/LaOCl and CCN/LaOCl with excitation wavelength of 363 nm.
- Figure S11.** XRD patterns of CCN/LaOCl before and after the photocatalytic reaction.
- Figure S12.** XPS survey spectrum (a), High resolution XPS spectra of C 1s (b), N 1s (c), La 3d (d), O 1s (e), Cl 2p (f), Pt 4f (g) and Co 2p (h) for Pt, CoO<sub>x</sub> loaded CCN/LaOCl before and after the photocatalytic reaction.
- Figure S13.** UPS spectra of CCN (a) and LaOCl (b).
- Figure S14.** Tauc plots of CCN (a) and LaOCl (b).

**Figure S15.** (a) HRTEM images of the CCN/LaOCl sample after the deposition of Pt. The corresponding EDS spectra (inset) indicates that there is a signal of Pt.

**Figure S16.** (a) HRTEM image of the CCN/LaOCl sample after the deposition of  $\text{CoO}_x$ , the image showing two variant shapes, among which the sheet-like one corresponds to CCN matrix, this is verified by the EDS mapping as displayed in the inset of (a). (b) EDS-HAADF image of the CCN/LaOCl sample after the deposition of  $\text{CoO}_x$ , the line profile across the nanoparticle in the inset of (b) demonstrates that the bright contrast corresponds to  $\text{CoO}_x$  particles.

**Table S1.** The BET specific surface area and the CCN amount of CCN/LaOCl-x samples.

**Table S2.** Fs-TA exponential function fitted parameters of absorption decay for PCN/LaOCl and CCN/LaOCl at 650 nm.

**Table S3.** Exponential function fitted parameters of the time-resolved PL decay spectra for the prepared samples.

**Table S4.** Comparison of photocatalytic activity for overall water splitting over carbon nitride-based materials.

**Table S5.** AQE of CCN/LaOCl for overall water splitting.

## Experimental Section

**Characterization of materials:** Scanning electron microscopy (SEM) images were collected using a Hitachi SU8010 field emission scanning electron microscope. Transmission electron microscopy (TEM) was performed using a Talos F200S microscope. The powder X-ray diffraction (XRD) was analyzed using a Bruker D8 Advance X-ray diffractometer. Solid-state  $^{13}\text{C}$  NMR measurements were performed on a Bruker Advance 500 spectrometer. Electron paramagnetic resonance (EPR) spectra was recorded on a Bruker A300 spectrometer. UV-vis diffuse reflectance spectra (UV-vis DRS) were obtained using a Varian Cary 5000 Scan UV-vis-NIR spectrophotometer. The Brunauer–Emmett–Teller (BET) specific surface areas were measured with an ASAP 2020 (Micromeritics Instrument Corp.). The contents of C and N are determined by element analysis (Vario EL Cube). X-ray photoelectron spectroscopy (XPS) measurements were performed on an ESCALAB 250 photoelectron spectroscopy system with the C1s peak (284.6 eV) as a reference. Ultraviolet photoelectron spectroscopy (UPS) measurements were conducted using an unfiltered He I (21.22 eV) gas discharge lamp. Femtosecond Transient Absorption (fsTA) measurements were performed through a femtosecond Ti:Sapphire regenerative amplified laser system (Spectra Physics, Spitfire-Pro) and the corresponding data acquisition system (Ultrafast Systems, Helios model), samples were irradiated with 400 nm laser light, and the data were collected by the acquisition system as the three-dimensional wavelength-time-absorbance matrices that were exported for further use with the fitting software. Photoluminescence (PL) spectra were obtained with an F-7000 FL spectrophotometer. The electrochemical impedance spectra (EIS) and photocurrent-time (I-t) profiles were conducted on a CHI660D electrochemical workstation using a Pt plate as the counter electrode and a saturated calomel electrode as the reference electrode, respectively. A 0.2 M  $\text{Na}_2\text{SO}_4$  solution was used as the electrolyte. To fabricate the working electrode, 20 mg sample was dispersed in 1 mL dimethylformamide (DMF) solvent with 40  $\mu\text{L}$  Nafion solution (5 wt.%, Du Pont) to form a homogeneous ink with ultra-sonication for 30 min. Next, 15  $\mu\text{L}$  of the dispersion was loaded onto fluorine-doped tin oxide (FTO) glass with an area of 0.25  $\text{cm}^2$  as the working electrode. The work functions (WF) of CCN and LaOCl were determined by Kelvin probe system (SKP5050, KP Technology Ltd.) with a single-point measurement. The work function of the tip was corrected using a gold disk (gold, 5.1 eV). The relationship between the (work functions) WF and the contact potential difference (CPD) can be calculated on the followed formula:

$$WF_{\text{sample}} = WF_{\text{tip}} + \text{CPD}$$

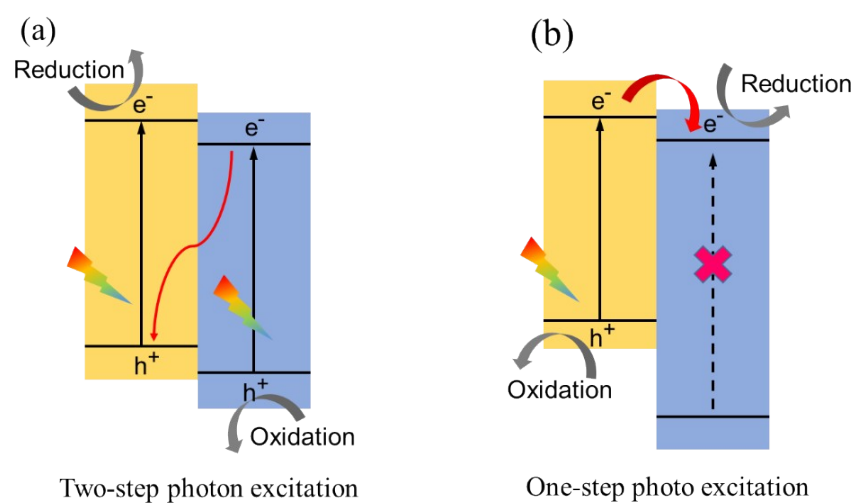

**Figure S1.** Schematic of two-step photon excitation (a) and one-step photon excitation (b) pathway.

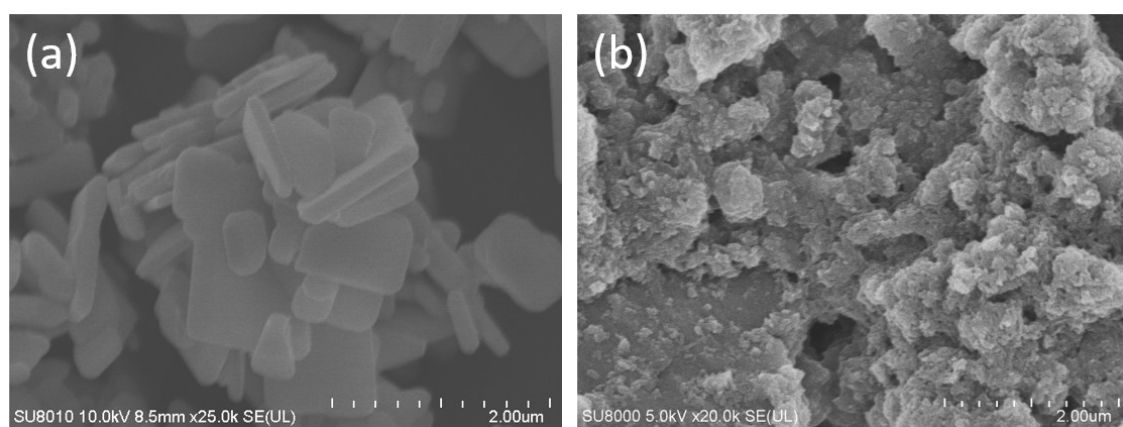

**Figure S2.** SEM images of LaOCl (a) and CCN (b).

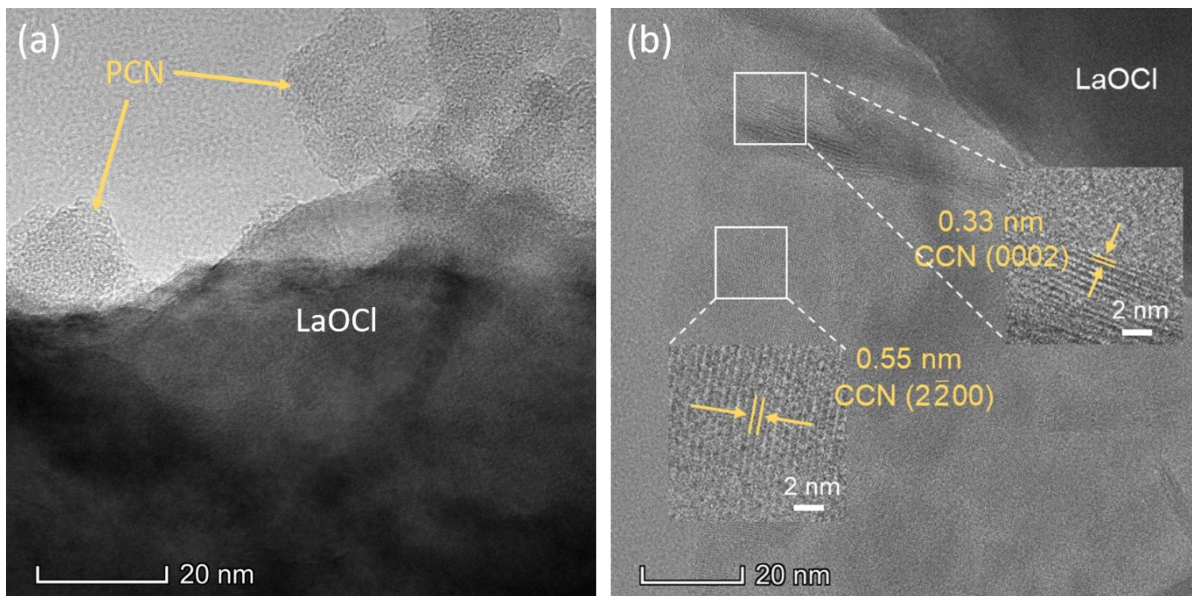

**Figure S3.** HRTEM image of PCN/LaOCl (a) and CCN/LaOCl (b).

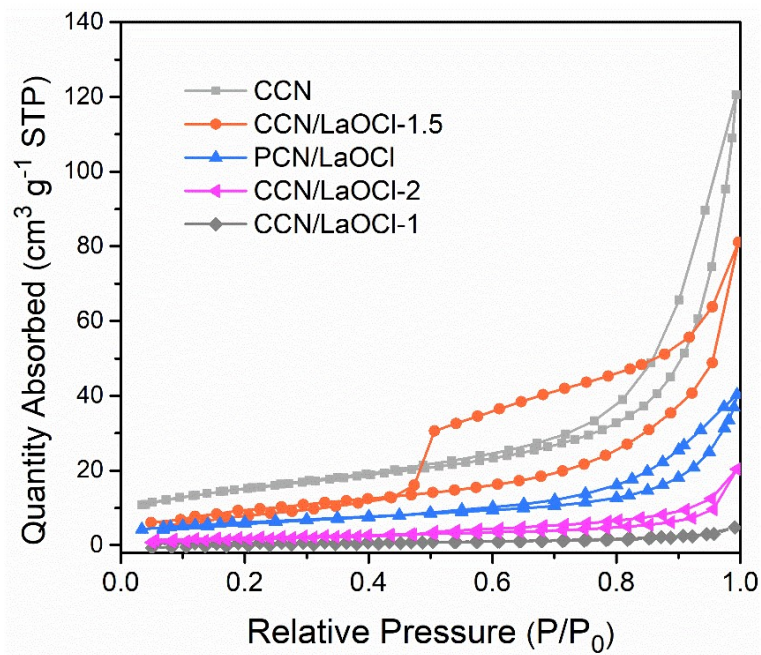

**Figure S4.** Nitrogen adsorption–desorption isotherms of CCN, CCN/LaOCl-*x* and PCN/LaOCl.

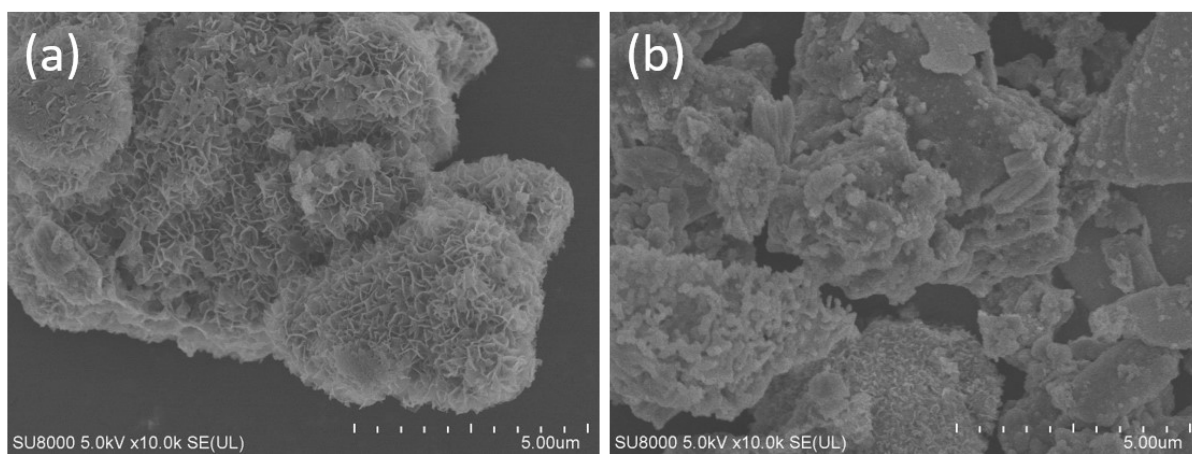

**Figure S5.** SEM image of (a) CCN/LaOCl-1.5 and (b) CCN/LaOCl-2.

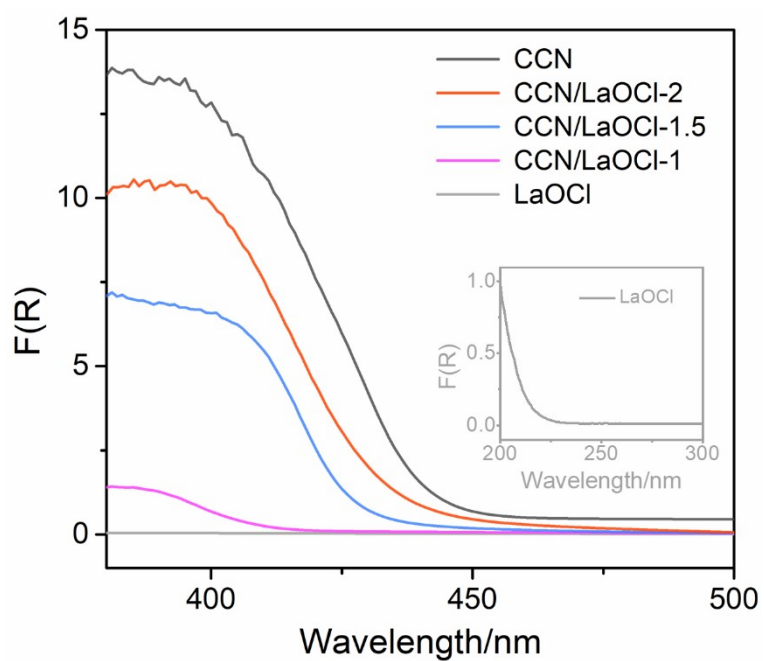

**Figure S6.** UV/Vis DRS spectrum of CCN, CCN/LaOCl- $x$  and LaOCl.



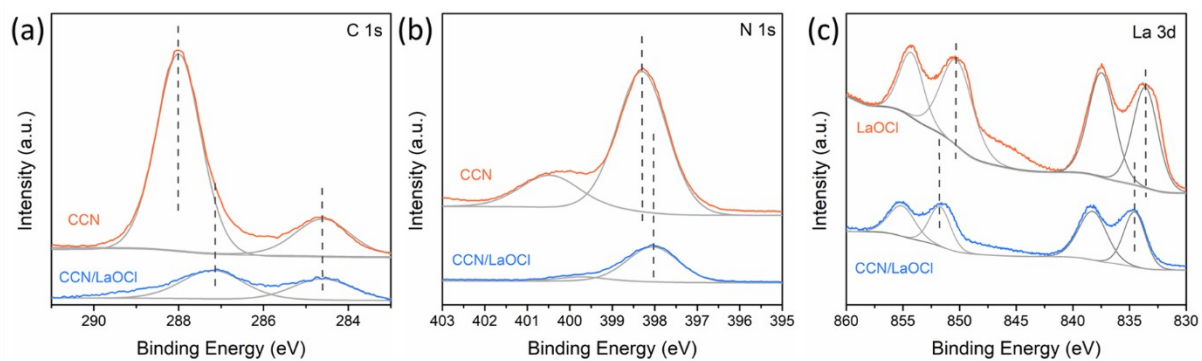

**Figure S7.** High resolution XPS spectra of (a) C 1s and (b) N 1s of CCN/LaOCl and CCN. (c) High resolution XPS spectra of La 3d for LaOCl and CCN/LaOCl.

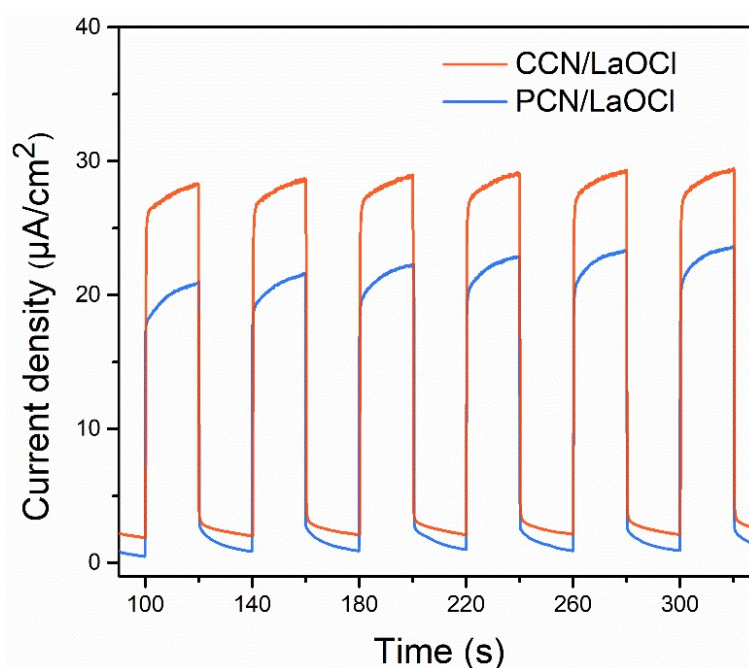

**Figure S8.** The transient photocurrents of the prepared electrodes covered with PCN/LaOCl and CCN/LaOCl.

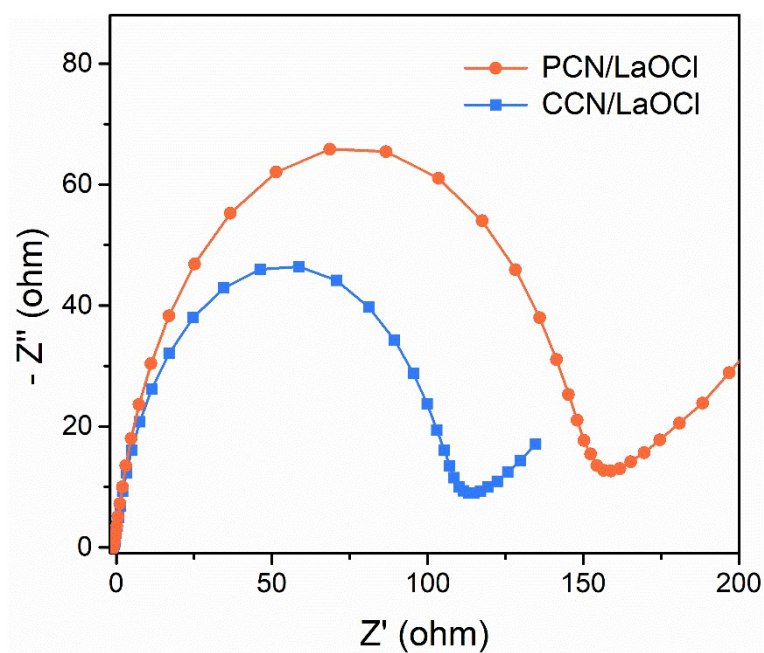

**Figure S9.** The EIS Nyquist plots of the prepared electrodes covered with PCN/LaOCl and CCN/LaOCl.

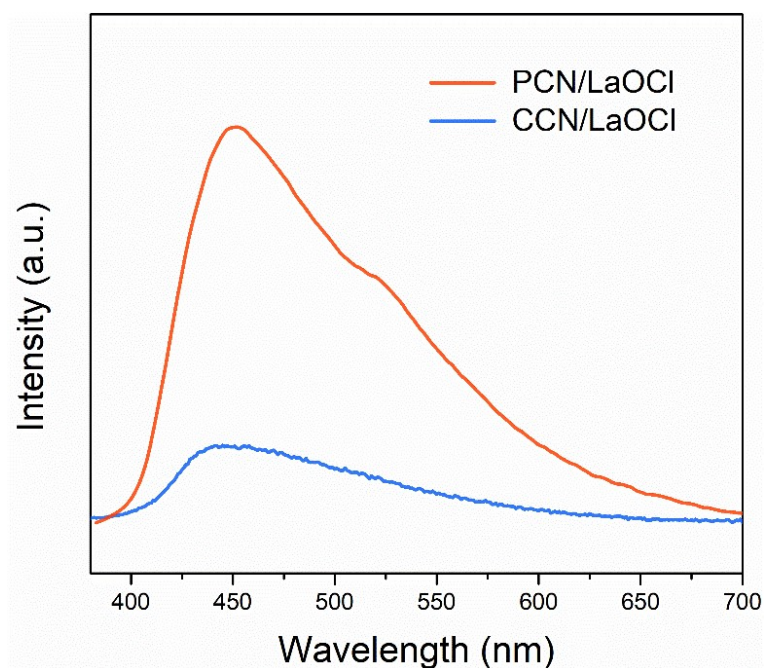

**Figure S10.** Photoluminescence spectra of PCN/LaOCl and CCN/LaOCl with excitation wavelength of 363 nm.



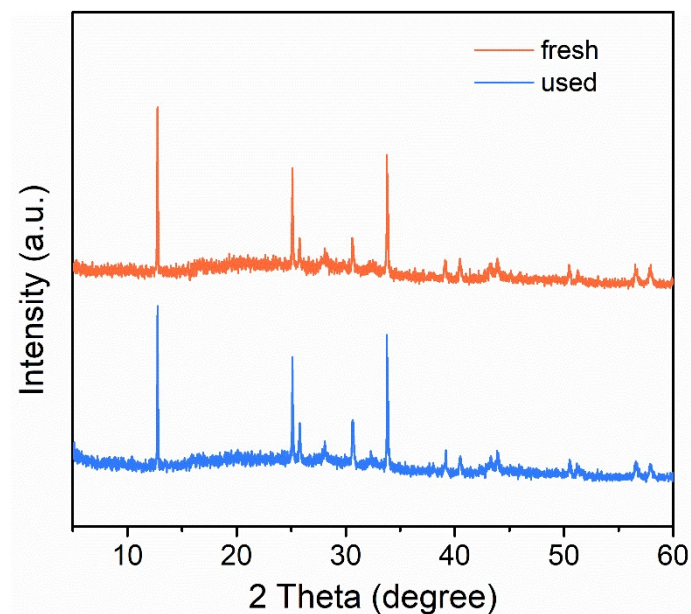

**Figure S11.** XRD patterns of CCN/LaOCl before and after the photocatalytic reaction.

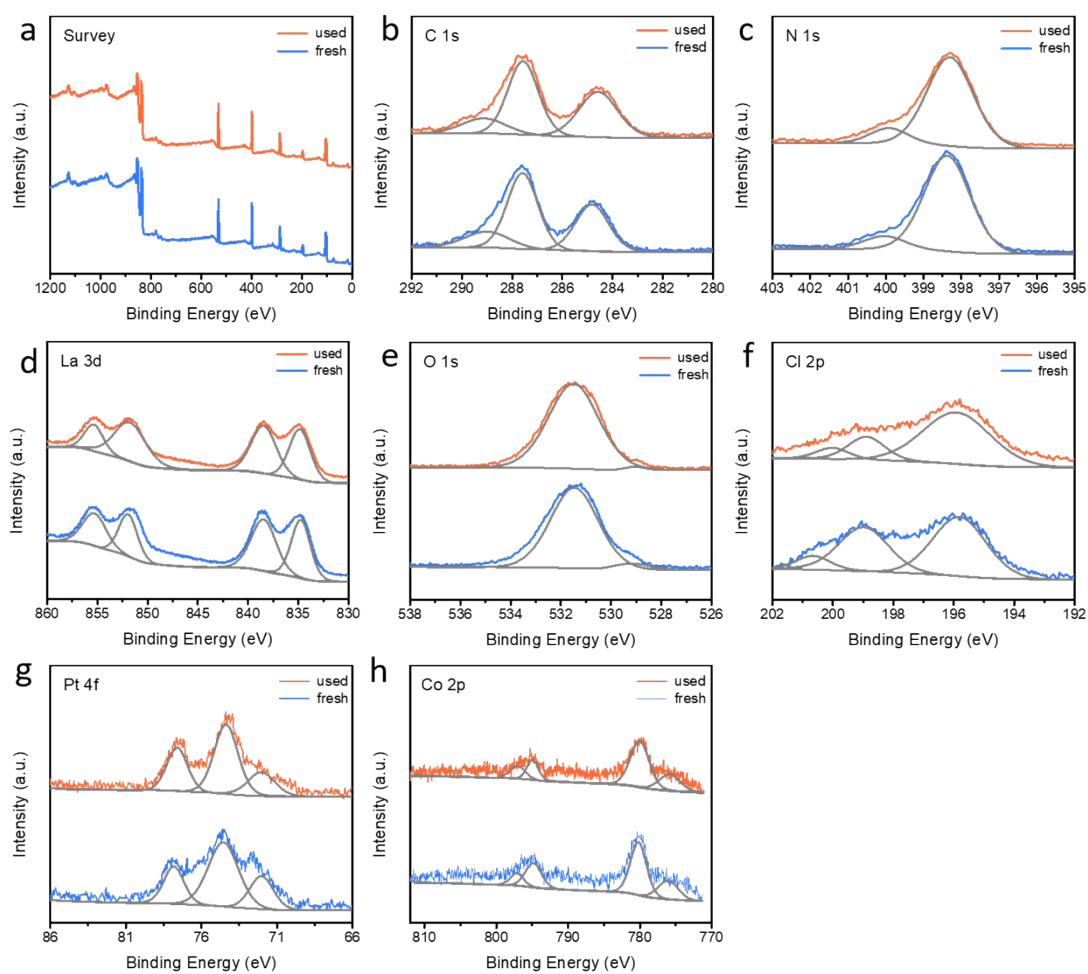

**Figure S12.** XPS survey spectrum (a), High resolution XPS spectra of C 1s (b), N 1s (c), La 3d (d), O 1s (e), Cl 2p (f), Pt 4f (g) and Co 2p (h) for Pt, CoO<sub>x</sub> loaded CCN/LaOCl before and after the photocatalytic reaction.

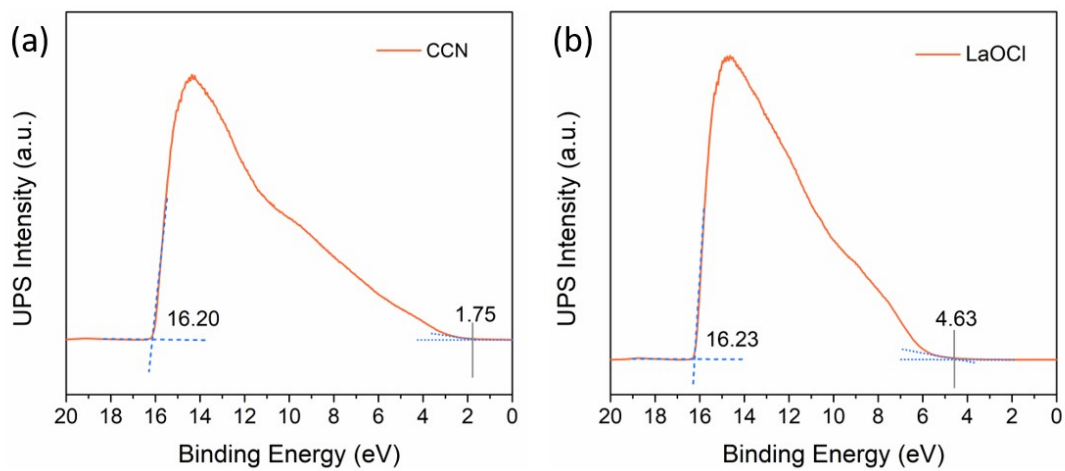

**Figure S13.** UPS spectra of CCN (a) and LaOCl (b).

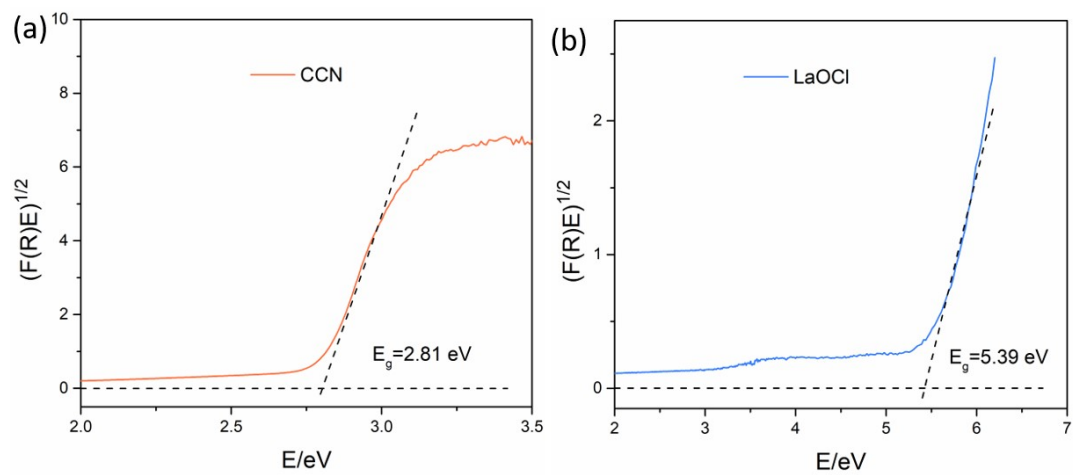

**Figure S14.** Tauc plots of CCN (a) and LaOCl (b).

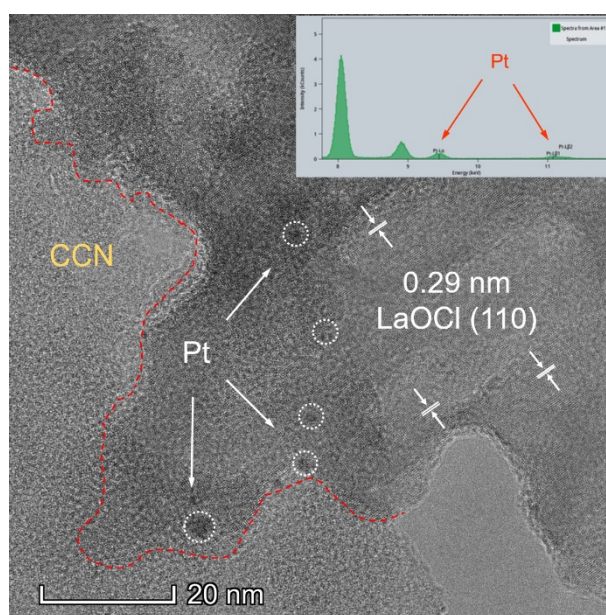

**Figure S15.** (a) HRTEM images of the CCN/LaOCl sample after the deposition of Pt. The corresponding EDS spectra (inset) indicates that there is a signal of Pt.

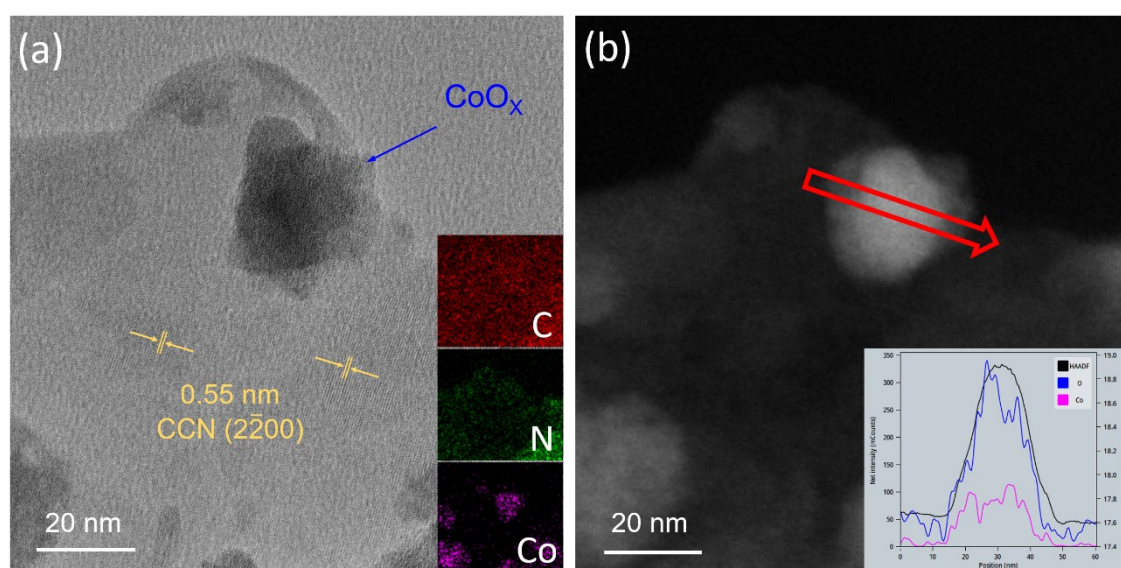

**Figure S16.** (a) HRTEM image of the CCN/LaOCl sample after the deposition of  $\text{CoO}_x$ , the image showing two variant shapes, among which the sheet-like one corresponds to CCN matrix, this is verified by the EDS mapping as displayed in the inset of (a). (b) EDS-HAADF image of the CCN/LaOCl sample after the deposition of  $\text{CoO}_x$ , the line profile across the nanoparticle in the inset of (b) demonstrates that the bright contrast corresponds to  $\text{CoO}_x$  particles.

**Table S1.** The BET specific surface area and the CCN amount of CCN/LaOCl-x samples.

| Samples       | Specific surface area (m <sup>2</sup> /g) | wt. % of CCN |
|---------------|-------------------------------------------|--------------|
| LaOCl         | 3.8                                       | -            |
| CCN/LaOCl-0.5 | 4.0                                       | 5.7          |
| CCN/LaOCl-1   | 4.3                                       | 13.1         |
| CCN/LaOCl-1.5 | 34.3                                      | 30.9         |
| CCN/LaOCl-2   | 8.6                                       | 40.4         |
| CCN/LaOCl-3   | 8.1                                       | 45.7         |

**Table S2.** Fs-TA exponential function fitted parameters of absorption decay for PCN/LaOCl and CCN/LaOCl at 650 nm.

| Materisla | $\tau_1$ (ps) | A <sub>1</sub> (%) | $\tau_2$ (ps) | A <sub>2</sub> (%) | Average $\tau$ (ps) |
|-----------|---------------|--------------------|---------------|--------------------|---------------------|
| PCN/LaOCl | 12.9          | 55.4               | 158           | 44.6               | 77.6                |
| CCN/LaOCl | 13.5          | 58.2               | 224           | 41.8               | 101.4               |

**Table S3.** Exponential function fitted parameters of the time-resolved PL decay spectra for the prepared samples.

| Samples   | $\tau_1$ (ns) | A <sub>1</sub> (%) | $\tau_2$ (ns) | A <sub>2</sub> (%) | Average $\tau$ (ns) |
|-----------|---------------|--------------------|---------------|--------------------|---------------------|
| PCN/LaOCl | 3.30          | 16                 | 0.61          | 84                 | 1.03                |
| CCN/LaOCl | 4.16          | 39                 | 0.79          | 61                 | 2.12                |

**Table S4.** Comparison of photocatalytic activity for overall water splitting over carbon nitride-based materials.

| Materials                                                          | Reaction conditions                                                                               | H <sub>2</sub> evolution rate (μmol h <sup>-1</sup> ) | O <sub>2</sub> evolution rate (μmol h <sup>-1</sup> ) | AQE (%)           | Ref.             |
|--------------------------------------------------------------------|---------------------------------------------------------------------------------------------------|-------------------------------------------------------|-------------------------------------------------------|-------------------|------------------|
| CCN/LaOCl                                                          | 300 W Xe lamp, 50 mg catalyst, 0.5 wt.% Pt, 0.2 wt.% CoO <sub>x</sub> cocatalyst                  | 60.6 (λ > 300 nm)<br>20.2 (λ > 400 nm)                | 28.1 (λ > 300 nm)<br>9.1 (λ > 400 nm)                 | 1.13<br>(400 nm)  | <b>This work</b> |
| PCN/LaOCl                                                          | 300 W Xe lamp, 50 mg catalyst, 0.5 wt.% Pt, 0.2 wt.% CoO <sub>x</sub> cocatalyst                  | 22.3 (λ > 300 nm)<br>8 (λ > 400 nm)                   | 10.7 (λ > 300 nm)<br>3.8 (λ > 400 nm)                 | 0.33<br>(400 nm)  | [1]              |
| g-C <sub>3</sub> N <sub>4</sub> /rGO/PDIP                          | 300 W Xe lamp, 25 mg catalyst, Pt/Cr <sub>2</sub> O <sub>3</sub> , Co(OH) <sub>2</sub> cocatalyst | 15.8 (λ > 420 nm)                                     | 7.8 (λ > 420 nm)                                      | 3.6<br>(420 nm)   | [2]              |
| CNN/BDCNN                                                          | 300 W Xe lamp, 40 mg catalyst, 0.9 wt.% Pt and 3.0 wt.% Co(OH) <sub>2</sub> cocatalyst            | 32.9 (λ > 300 nm)<br>9.85 (λ > 420 nm)                | 16.4 (λ > 300 nm)<br>4.88 (λ > 420 nm)                | 11.90<br>(400 nm) | [3]              |
| BDCNN350/B<br>DCNN425                                              | 300 W Xe lamp, 100 mg catalyst, 0.9 wt.% Pt and 3.0 wt.% Co(OH) <sub>2</sub> cocatalyst           | 62.9 (λ > 300 nm)                                     | 31.3 (λ > 300 nm)                                     | 23.52<br>(420 nm) | [3]              |
| PTI-550                                                            | 300 W Xe lamp, 100 mg catalyst, 0.5 wt.% Co and 1.0 wt.% Pt cocatalyst                            | 189 (λ > 300 nm)                                      | 91 (λ > 300 nm)                                       | 8<br>(365 nm)     | [4]              |
| 3D g-C <sub>3</sub> N <sub>4</sub> NS                              | 300 W Xe lamp, 50 mg catalyst, 1 wt.% Pt, 3 wt.% IrO <sub>2</sub> cocatalyst                      | 5.1 (λ > 420 nm)                                      | 2.5 (λ > 420 nm)                                      | 1.4<br>(420 nm)   | [5]              |
| Fe <sub>2</sub> O <sub>3</sub> /RGO/PCN                            | 300 W Xe lamp, 40 mg catalyst, Pt cocatalyst                                                      | 43.6 (λ > 300 nm)<br>6 (λ > 400 nm)                   | 21.2 (λ > 300 nm)<br>3 (λ > 400 nm)                   | N/A               | [6]              |
| Pt/g-C <sub>3</sub> N <sub>4</sub>                                 | 300 W Xe lamp, 200 mg catalyst, 3 wt.% Pt, 1 wt.% CoO <sub>x</sub> cocatalyst                     | 12.2 (λ > 300 nm)<br>1.2 (λ > 420 nm)                 | 6.3 (λ > 400 nm)<br>0.6 (λ > 420 nm)                  | 0.3<br>(405 nm)   | [7]              |
| Co <sub>3</sub> O <sub>4</sub> /HCNS/Pt                            | 300 W Xe lamp, 20 mg catalyst, 1 wt.% Pt, 3 wt.% Co <sub>3</sub> O <sub>4</sub> cocatalyst        | 3.2 (λ > 300 nm)                                      | 1.7 (λ > 300 nm)                                      | N/A               | [8]              |
| Pt/CoP/g-C <sub>3</sub> N <sub>4</sub>                             | 300 W Xe lamp, 80 mg catalyst, pH = 3, 3 wt.% Pt, 3 wt.% CoP cocatalyst                           | 21 (λ > 300 nm)<br>2.1 (λ > 400 nm)                   | 10 (λ > 300 nm)<br>1.0 (λ > 400 nm)                   | N/A               | [9]              |
| α-Fe <sub>2</sub> O <sub>3</sub> /2D-C <sub>3</sub> N <sub>4</sub> | 300 W Xe lamp, 10 mg catalyst, 3 wt.% Pt, 0.1 wt.% RuO <sub>2</sub> cocatalyst                    | 0.38 (λ > 400 nm)                                     | 0.19 (λ > 400 nm)                                     | N/A               | [10]             |
| Na-CN                                                              | 300 W Xe lamp, 100 mg catalyst, 1 wt.% Pt cocatalyst                                              | 31.5 (λ > 420 nm)                                     | 15.2 (λ > 420 nm)                                     | 1.45<br>(420 nm)  | [11]             |
| Co <sub>1</sub> -phosphide/CN                                      | 300 W Xe lamp, 20 mg catalyst,                                                                    | 8.2 (λ > 300 nm)<br>2,5 (λ > 420 nm)                  | 4.1 (λ > 300 nm)<br>1.3 (λ > 420 nm)                  | 2.2<br>(500 nm)   | [12]             |
| (C <sub>ring</sub> )-C <sub>3</sub> N <sub>4</sub>                 | 300 W Xe lamp, 30 mg catalyst, 3 wt.% of Pt cocatalyst                                            | 11.1 (λ > 300 nm)<br>4.5 (λ > 420 nm)                 | 5.5 (λ > 300 nm)<br>2.2 (λ > 420 nm)                  | 5<br>(420 nm)     | [13]             |
| C <sub>Co</sub> -C <sub>3</sub> N <sub>4</sub>                     | 300 W Xe lamp, 30 mg catalyst,                                                                    | 15.9 (λ > 300 nm)                                     | 7.7 (λ > 300 nm)                                      | N/A               | [14]             |
| CQDs/ holey CN                                                     | 300 W Xe lamp, 10 mg catalyst, 2 wt.% of Pt cocatalyst                                            | 9.3 (λ > 420 nm)                                      | 4.6 (λ > 420 nm)                                      | N/A               | [15]             |

|                                                   |                                                                      |                                                         |                                                         |                  |      |
|---------------------------------------------------|----------------------------------------------------------------------|---------------------------------------------------------|---------------------------------------------------------|------------------|------|
| CoO/g-C <sub>3</sub> N <sub>4</sub>               | LED, 50 mg catalyst,                                                 | 2.5 ( $\lambda > 400$ nm)                               | 1.4 ( $\lambda > 400$ nm)                               | 1.91<br>(420 nm) | [16] |
| C <sub>3</sub> N <sub>4</sub> /MnO <sub>2</sub>   | 300 W Xe lamp, 100 mg catalyst,                                      | 5.5 ( $\lambda > 420$ nm)                               | 2.8 ( $\lambda > 420$ nm)                               | ~3.7<br>(420 nm) | [17] |
| g-C <sub>3</sub> N <sub>4</sub> -carbon dots      | 300 W Xe lamp, 100 mg catalyst,                                      | 0.5 ( $\lambda > 420$ nm)                               | 0.25 ( $\lambda > 420$ nm)                              | N/A              | [18] |
| MnO <sub>2</sub> /g-C <sub>3</sub> N <sub>4</sub> | 300 W Xe lamp, 100 mg catalyst, 3 wt.% of Pt cocatalyst              | 6.1 ( $\lambda > 400$ nm)                               | 2.9 ( $\lambda > 400$ nm)                               | N/A              | [19] |
| Mn-C <sub>3</sub> N <sub>4</sub>                  | 300 W Xe lamp, 20 mg catalyst, 0.9 wt.% of Pt cocatalyst             | 13.9 ( $\lambda > 300$ nm)<br>6.1 ( $\lambda > 420$ nm) | 6.6 ( $\lambda > 300$ nm)<br>2.9 ( $\lambda > 420$ nm)  | 4.0<br>(420 nm)  | [20] |
| TH-CN                                             | 300 W Xe lamp, 50 mg catalyst, 1 wt. % CoP, 1.5 wt. % Pt, Ph=5.6     | 10.2 ( $\lambda > 400$ nm)                              | 5.7 ( $\lambda > 400$ nm)                               | N/A              | [21] |
| PTI-LiNa                                          | 300 W Xe lamp, 100 mg catalyst, 0.5 wt% Co and 1.0 wt% Pt cocatalyst | 273 ( $\lambda > 300$ nm)                               | 135 ( $\lambda > 300$ nm)                               | 12%<br>(365 nm)  | [22] |
| NdCo <sub>3</sub> /PCN                            | 300 W Xe lamp, 40 mg catalyst                                        | 11.8 ( $\lambda > 300$ nm)<br>0.7 ( $\lambda > 420$ nm) | 6.0 ( $\lambda > 300$ nm)<br>0.35 ( $\lambda > 420$ nm) | 2.0<br>(350 nm)  | [23] |
| C <sub>3</sub> N <sub>4</sub> -Cl4                | 20 mg catalyst, Pt cocatalyst                                        | 48.2 ( $\lambda > 300$ nm)                              | 21.8 ( $\lambda > 300$ nm)                              | 6.9<br>(420 nm)  | [24] |

**Table S5.** AQE of CCN/LaOCl for overall water splitting.

| Wavelengths (nm) | H <sub>2</sub> evolution ( $\mu\text{mol/h}$ ) | Light power (mW/cm <sup>2</sup> ) | irradiated area (cm <sup>2</sup> ) | AQE(%) |
|------------------|------------------------------------------------|-----------------------------------|------------------------------------|--------|
| 380              | 31.4                                           | 13.42                             | 32.15                              | 1.27   |
| 400              | 37.6                                           | 17.16                             | 32.15                              | 1.13   |
| 420              | 11.2                                           | 12.53                             | 32.15                              | 0.44   |
| 450              | 2.1                                            | 17.06                             | 32.15                              | 0.05   |
| 475              | 0.6                                            | 16.11                             | 32.15                              | 0.02   |

## References for Supporting Information

- [1] Y. Lin, W. Su, X. Wang, X. Fu, X. Wang, *Angew. Chem. Int. Ed.* 2020, 59, 20919.  
[2] X. Chen, J. Wang, Y. Chai, Z. Zhang, Y. Zhu, *Adv. Mater.* 2021, 33, e2007479.  
[3] D. Zhao, Y. Wang, C.-L. Dong, Y.-C. Huang, J. Chen, F. Xue, S. Shen, L. Guo, *Nat. Energy* 2021, 6, 388.  
[4] L. H. Lin, Z. Y. Lin, J. Zhang, X. Cai, W. Lin, Z. Y. Yu, X. C. Wang, *Nat. Catal.* 2020, 3, 649.  
[5] X. Chen, R. Shi, Q. Chen, Z. Zhang, W. Jiang, Y. Zhu, T. Zhang, *Nano Energy* 2019, 59, 644.  
[6] Z. Pan, G. Zhang, X. Wang, *Angew. Chem. Int. Ed.* 2019, 58, 7102.  
[7] G. Zhang, Z. A. Lan, L. Lin, S. Lin, X. Wang, *Chem. Sci.* 2016, 7, 3062.  
[8] D. Zheng, X. N. Cao, X. Wang, *Angew. Chem. Int. Ed.* 2016, 55, 11512.



- [9] Z. Pan, Y. Zheng, F. Guo, P. Niu, X. Wang, *ChemSusChem* 2017, 10, 87.
- [10] X. She, J. Wu, H. Xu, J. Zhong, Y. Wang, Y. Song, K. Nie, Y. Liu, Y. Yang, M.-T. F. Rodrigues, R. Vajtai, J. Lou, D. Du, H. Li, P. M. Ajayan, *Adv. Energy Mater.* 2017, 7, 1700025.
- [11] F. Guo, J. Chen, M. Zhang, B. Gao, B. Lin, Y. Chen, *J. Mater. Chem. A* 2016, 4, 10806.
- [12] W. Liu, L. Cao, W. Cheng, Y. Cao, X. Liu, W. Zhang, X. Mou, L. Jin, X. Zheng, W. Che, Q. Liu, T. Yao, S. Wei, *Angew. Chem. Int. Ed.* 2017, 56, 9312.
- [13] W. Che, W. Cheng, T. Yao, F. Tang, W. Liu, H. Su, Y. Huang, Q. Liu, J. Liu, F. Hu, Z. Pan, Z. Sun, S. Wei, *J. Am. Chem. Soc.* 2017, 139, 3021.
- [14] X. Fang, R. Gao, Y. Yang, D. Yan, *iScience* 2019, 16, 22.
- [15] T. Song, P. Zhang, T. Wang, A. Ali, H. Zeng, *Appl. Catal. B-Environ.* 2018, 224, 877.
- [16] F. Guo, W. Shi, C. Zhu, H. Li, Z. Kang, *Appl. Catal. B-Environ.* 2018, 226, 412.
- [17] J. Liu, N. Y. Liu, H. Li, L. P. Wang, X. Q. Wu, H. Huang, Y. Liu, F. Bao, Y. Lifshitz, S. T. Lee, Z. H. Kang, *Nanoscale* 2016, 8, 11956.
- [18] D. Qu, J. Liu, X. Miao, M. Han, H. Zhang, Z. Cui, S. Sun, Z. Kang, H. Fan, Z. Sun, *Appl. Catal. B-Environ.* 2018, 227, 418.
- [19] Z. Mo, H. Xu, Z. Chen, X. She, Y. Song, J. Lian, X. Zhu, P. Yan, Y. Lei, S. Yuan, H. Li, *Appl. Catal. B-Environ.* 2019, 241, 452.
- [20] S. Sun, G. Shen, J. Jiang, W. Mi, X. Liu, L. Pan, X. Zhang, J. J. Zou, *Adv. Energy Mater.* 2019, 1901505.
- [21] Z. Pan, M. Liu, G. Zhang, H. Zhuzhang, X. Wang, *J. Phys. Chem. C* 2021, 125, 9818.
- [22] M. Liu, C. Wei, H. Zhuzhang, J. Zhou, Z. Pan, W. Lin, Z. Yu, G. Zhang, X. Wang, *Angew. Chem. Int. Ed.* 2022, 61, e202113389.
- [23] R. Chen, G. L. Zhuang, Z. Y. Wang, Y. J. Gao, Z. Li, C. Wang, Y. Zhou, M. H. Du, S. Zeng, L. S. Long, X. J. Kong, L. S. Zheng, *Natl. Sci. Rev.* 2021, 8, nwaa234.
- [24] Q. Zhang, X. Chen, Z. Yang, T. Yu, L. Liu, J. Ye, *ACS Appl. Mater. Interfaces* 2022, 14, 3970.
